# Supplementary material for: Essential gene prediction using limited gene essentiality information–An integrative semi-supervised machine learning strategy
Source: PLoS One. 2020 Nov 30;15(11):e0242943. doi: 10.1371/journal.pone.0242943 (PMC7703937; doi:10.1371/journal.pone.0242943)
Supplement: S5 Table — (DOCX) [file pone.0242943.s009.docx]

**S5 Table. Gene essentiality information of Reaction Gene combinations in *Leishmania donovani* predicted using our proposed pipeline**

| **Abbreviation** |
| --- |
| E, Essential gene |
| N, Non-essential gene |
| UD, Undetermined (Not Known) |

#Experimental Gene Essentiality Information ( Jones,N.G. et al. (2018) ACS Infect. Dis., 4, 467–477.)

| **GeneReaction** | **Experiment#** | **Predicted** |  | **GeneReaction** | **Experiment#** | **Predicted** |  | **GeneReaction** | **Experiment#** | **Predicted** |
| --- | --- | --- | --- | --- | --- | --- | --- | --- | --- | --- |
| 4COUCOAL|LdBPK_303150 | E | E |  | DAGCPT|LdBPK_281250 | UD | N |  | HINDOALDtm|LdBPK_040960 | UD | N |
| DKMD2K|LdBPK_160590 | E | E |  | DAGCPTm|LdBPK_010490 | UD | N |  | HINDOALDtm|LdBPK_340120 | UD | N |
| LACDtg|LdBPK_341110 | E | E |  | DAGCPTm|LdBPK_010510 | UD | N |  | HINDOALDtm|LdBPK_340130 | UD | N |
| MLTHFtm|LdBPK_040570 | E | E |  | DAGCPTm|LdBPK_010520 | UD | N |  | HISt6|LdBPK_060890 | UD | N |
| PMTCOAtm|LdBPK_120105 | E | E |  | DAGCPTm|LdBPK_010540 | UD | N |  | HISTRS|LdBPK_343580 | UD | N |
| THRt6|LdBPK_181500 | UD | E |  | DAGCPTm|LdBPK_010550 | UD | N |  | HKAm|LdBPK_180440 | UD | N |
| THRt6|LdBPK_181510 | UD | E |  | DAGCPTm|LdBPK_030220 | UD | N |  | HKAm|LdBPK_191380 | UD | N |
| THYMDtm|LdBPK_060910 | UD | E |  | DAGCPTm|LdBPK_130300 | UD | N |  | HMGCOARx|LdBPK_261530 | UD | N |
| THYMDtm|LdBPK_070150 | UD | E |  | DAGCPTm|LdBPK_281250 | UD | N |  | HMGCOARx|LdBPK_292420 | UD | N |
| THYMDtm|LdBPK_282700 | UD | E |  | DAGK|LdBPK_010490 | UD | N |  | HMGCOARx|LdBPK_350360 | UD | N |
| THYMDtm|LdBPK_352780 | UD | E |  | DAGK|LdBPK_010510 | UD | N |  | HMGCOAtg|LdBPK_323110 | UD | N |
| TKT1g|LdBPK_341170 | UD | E |  | DAGK|LdBPK_010520 | UD | N |  | HMGCOAtg|LdBPK_353910 | UD | N |
| TKT2g|LdBPK_341170 | UD | E |  | DAGK|LdBPK_010540 | UD | N |  | HMGS|LdBPK_180580 | UD | N |
| TMDPP|LdBPK_302920 | UD | E |  | DAGK|LdBPK_010550 | UD | N |  | HMGS|LdBPK_323830 | UD | N |
| TMDPP|LdBPK_365410 | UD | E |  | DAGK|LdBPK_030220 | UD | N |  | HMGS|LdBPK_332740 | UD | N |
| TMDS|LdBPK_120200 | UD | E |  | DAGK|LdBPK_130300 | UD | N |  | HOCHL3m|LdBPK_260200 | UD | N |
| TPIg|LdBPK_362740 | UD | E |  | DAGK|LdBPK_281250 | UD | N |  | HOCHL3m|LdBPK_341900 | UD | N |
| TRNAGLNtm|LdBPK_290920 | UD | E |  | DAGKm|LdBPK_261530 | UD | N |  | HOCR3m|LdBPK_292080 | UD | N |
| TRNAGLUtm|LdBPK_230500 | UD | E |  | DAGKm|LdBPK_332740 | UD | N |  | HPROa|LdBPK_070930 | UD | N |
| TRNAGLUtm|LdBPK_364510 | UD | E |  | DAGKm|LdBPK_361200 | UD | N |  | HPROxm|LdBPK_210300 | UD | N |
| TROPtm|LdBPK_040440 | UD | E |  | DATPtn|LdBPK_010310 | UD | N |  | HPROxm|LdBPK_210310 | UD | N |
| TRPDOXtn|LdBPK_323110 | UD | E |  | DCCOADm|LdBPK_363750 | UD | N |  | HPROym|LdBPK_283250 | UD | N |
| TRPDOXtn|LdBPK_353910 | UD | E |  | DCTPtn|LdBPK_331150 | UD | N |  | HSD|LdBPK_321220 | UD | N |
| TRPDRDtn|LdBPK_040270 | UD | E |  | DCTPtn|LdBPK_362390 | UD | N |  | HSK|LdBPK_140700 | UD | N |
| TRPDRDtn|LdBPK_130870 | UD | E |  | DCYTD1|LdBPK_240870 | UD | N |  | HTDR6m|LdBPK_240310 | UD | N |
| TRPDRDtn|LdBPK_322690 | UD | E |  | DCYTt|LdBPK_366670 | UD | N |  | HXANt2|LdBPK_354790 | UD | N |
| TRPDRDtn|LdBPK_354860 | UD | E |  | DDMAT5m|LdBPK_180690 | UD | N |  | HXANt2|LdBPK_363990 | UD | N |
| TRPTRS|LdBPK_311800 | UD | E |  | DDMAT5m|LdBPK_180700 | UD | N |  | HXANt2|LdBPK_364000 | UD | N |
| TRYPm|LdBPK_241910 | UD | E |  | DDMAT5m5|LdBPK_100310 | UD | N |  | HXANtg|LdBPK_230580 | UD | N |
| TRYR|LdBPK_241910 | UD | E |  | DDMAT5m5|LdBPK_332680 | UD | N |  | HXANtg|LdBPK_230880 | UD | N |
| TYRabc|LdBPK_010470 | UD | E |  | DESAT224_4|LdBPK_340630 | UD | N |  | HXPRTg|LdBPK_354660 | UD | N |
| TYRTA|LdBPK_180440 | UD | E |  | DGDPter|LdBPK_350840 | UD | N |  | HYDCOAtm|LdBPK_350840 | UD | N |
| TYRTA|LdBPK_191380 | UD | E |  | DGDPter|LdBPK_362490 | UD | N |  | HYDCOAtm|LdBPK_362490 | UD | N |
| TYRTA2|LdBPK_120580 | UD | E |  | DGK1er|LdBPK_210300 | UD | N |  | ICDHym|LdBPK_261590 | UD | N |
| TYRTA2|LdBPK_350840 | UD | E |  | DGK1er|LdBPK_210310 | UD | N |  | IDPtn|LdBPK_331150 | UD | N |
| TYRTA3|LdBPK_260680 | UD | E |  | dGTPte|LdBPK_140330 | UD | N |  | IDPtn|LdBPK_362390 | UD | N |
| UAGDP|LdBPK_050180 | UD | E |  | dGTPte|LdBPK_271500 | UD | N |  | ILETAc|LdBPK_180020 | UD | N |
| UAGDP|LdBPK_250020 | UD | E |  | dGTPte|LdBPK_310350 | UD | N |  | IMPDg|LdBPK_251160 | UD | N |
| UDPDPS|LdBPK_366170 | UD | E |  | dGTPte|LdBPK_310360 | UD | N |  | IMZACtm|LdBPK_050180 | UD | N |
| UDPGALtg|LdBPK_230580 | UD | E |  | dGTPte|LdBPK_311850 | UD | N |  | IMZACtm|LdBPK_250020 | UD | N |
| UDPGALtg|LdBPK_230880 | UD | E |  | dGTPte|LdBPK_311860 | UD | N |  | IND3ACtm|LdBPK_270310 | UD | N |
| UDPGtg|LdBPK_181580 | UD | E |  | dGTPte|LdBPK_322800 | UD | N |  | INDPYRD|LdBPK_322440 | UD | N |
| UDPtn|LdBPK_252480 | UD | E |  | dGTPte|LdBPK_331510 | UD | N |  | INSter|LdBPK_070240 | UD | N |
| UDPtn|LdBPK_361410 | UD | E |  | dGTPte|LdBPK_355070 | UD | N |  | INSter|LdBPK_310010 | UD | N |
| UDPx|LdBPK_241880 | UD | E |  | dGTPte|LdBPK_355320 | UD | N |  | INStm|LdBPK_060910 | UD | N |
| UDPx|LdBPK_242110 | UD | E |  | dGTPte|LdBPK_360450 | UD | N |  | INStm|LdBPK_070150 | UD | N |
| UDPx|LdBPK_272390 | UD | E |  | dGTPte|LdBPK_364700 | UD | N |  | INStm|LdBPK_282700 | UD | N |
| UMPK|LdBPK_271940 | UD | E |  | dGTPte|LdBPK_367150 | UD | N |  | INStm|LdBPK_352780 | UD | N |
| UMPK|LdBPK_290290 | UD | E |  | DHAPAx|LdBPK_261530 | UD | N |  | IPDDI|LdBPK_270740 | UD | N |
| URAtn|LdBPK_323110 | UD | E |  | DHAPAx|LdBPK_332740 | UD | N |  | IPDDI|LdBPK_363630 | UD | N |
| URAtn|LdBPK_353910 | UD | E |  | DHAPAx|LdBPK_361200 | UD | N |  | IPP5P|LdBPK_352790 | UD | N |
| UREAt|LdBPK_360280 | UD | E |  | DHAPtg|LdBPK_060580 | UD | N |  | ITPtn|LdBPK_330250 | UD | N |
| UREAtg|LdBPK_170410 | UD | E |  | DHCRD2|LdBPK_141450 | UD | N |  | KYNASE1|LdBPK_261670 | UD | N |
| UREAtg|LdBPK_322210 | UD | E |  | DHDASCBtm|LdBPK_060910 | UD | N |  | KYNASE1|LdBPK_261680 | UD | N |
| URItn|LdBPK_210990 | UD | E |  | DHDASCBtm|LdBPK_070150 | UD | N |  | KYNASE3|LdBPK_311800 | UD | N |
| VALt6|LdBPK_050980 | UD | E |  | DHDASCBtm|LdBPK_282700 | UD | N |  | LDH_D|LdBPK_030790 | UD | N |
| VALt6|LdBPK_170320 | UD | E |  | DHDASCBtm|LdBPK_352780 | UD | N |  | LDH_D|LdBPK_260300 | UD | N |
| VALt6|LdBPK_181460 | UD | E |  | DHFOR2a|LdBPK_340630 | UD | N |  | LDH_L|LdBPK_321660 | UD | N |
| VALt6|LdBPK_270300 | UD | E |  | DHFRa|LdBPK_230410 | UD | N |  | LEUt6|LdBPK_282530 | UD | N |
| VALt6|LdBPK_270590 | UD | E |  | DHNPTtn|LdBPK_323110 | UD | N |  | LEUTAm|LdBPK_180020 | UD | N |
| VALt6|LdBPK_282170 | UD | E |  | DHNPTtn|LdBPK_353910 | UD | N |  | LGLUtg|LdBPK_323110 | UD | N |
| VALt6|LdBPK_323370 | UD | E |  | DHORTS|LdBPK_120200 | UD | N |  | LGLUtg|LdBPK_353910 | UD | N |
| VALt6|LdBPK_352010 | UD | E |  | DHPEG|LdBPK_343530 | UD | N |  | LGTHL1m|LdBPK_070870 | UD | N |
| VALt6|LdBPK_365620 | UD | E |  | DHPEG|LdBPK_350320 | UD | N |  | LGTHL1m|LdBPK_360160 | UD | N |
| VALTAc|LdBPK_161410 | UD | E |  | DITPtn|LdBPK_323110 | UD | N |  | LINCOAe|LdBPK_270430 | UD | N |
| VALTRS|LdBPK_060350 | UD | E |  | DITPtn|LdBPK_353910 | UD | N |  | LINCOAtm|LdBPK_220013 | UD | N |
| VTm|LdBPK_061330 | UD | E |  | DMATTx|LdBPK_251160 | UD | N |  | LIPOAS2|LdBPK_332430 | UD | N |
| XANt2|LdBPK_331010 | UD | E |  | DNTPPAn|LdBPK_340630 | UD | N |  | LIPOT|LdBPK_171260 | UD | N |
| XANtg|LdBPK_221110 | UD | E |  | DOLPMTcer|LdBPK_301910 | UD | N |  | LIPOT|LdBPK_180990 | UD | N |
| XANtg|LdBPK_271970 | UD | E |  | DOLPMTcer|LdBPK_301920 | UD | N |  | LPS|LdBPK_140520 | UD | N |
| XANtg|LdBPK_280980 | UD | E |  | DOLPMTcer|LdBPK_332470 | UD | N |  | LPS|LdBPK_242340 | UD | N |
| XMPtg|LdBPK_365650 | UD | E |  | DOLPs|LdBPK_261530 | UD | N |  | LSTO1r|LdBPK_180580 | UD | N |
| XTSN2t|LdBPK_070210 | UD | E |  | DPMVDx|LdBPK_270090 | UD | N |  | LSTO1r|LdBPK_323830 | UD | N |
| XTSN2t|LdBPK_312650 | UD | E |  | DRBKr|LdBPK_320940 | UD | N |  | LSTO1r|LdBPK_332740 | UD | N |
| XTSN2t|LdBPK_350100 | UD | E |  | DTDPGALtg|LdBPK_010280 | UD | N |  | LYSPLpe|LdBPK_333420 | UD | N |
| XTSN2t|LdBPK_351540 | UD | E |  | DTDPGALtg|LdBPK_040240 | UD | N |  | LYSTRS|LdBPK_160960 | UD | N |
| XYLTRED_D|LdBPK_161340 | UD | E |  | DTDPGALtg|LdBPK_150410 | UD | N |  | MALCOAter|LdBPK_303560 | UD | N |
| XYLTRED_D|LdBPK_355060 | UD | E |  | DTDPGALtg|LdBPK_260410 | UD | N |  | MALT1|LdBPK_241880 | UD | N |
| ZYMSTt|LdBPK_330530 | UD | E |  | DTDPGALtg|LdBPK_261140 | UD | N |  | MALT1|LdBPK_242110 | UD | N |
| ZYMSTter|LdBPK_353280 | UD | E |  | DTDPGALtg|LdBPK_301530 | UD | N |  | MALT1|LdBPK_272390 | UD | N |
| TAG6Ptg|LdBPK_160560 | E | N |  | DTDPGALtg|LdBPK_301570 | UD | N |  | MAN1ptg|LdBPK_365780 | UD | N |
| 2H3Mtm|LdBPK_352200 | N | N |  | DTDPGALtg|LdBPK_301940 | UD | N |  | MAN6PI|LdBPK_340630 | UD | N |
| ADE34t|LdBPK_281070 | N | N |  | DTDPGALtg|LdBPK_361740 | UD | N |  | MANS|LdBPK_322070 | UD | N |
| NDPKn7|LdBPK_362480 | N | N |  | DTMPtm|LdBPK_151120 | UD | N |  | MANt2|LdBPK_300630 | UD | N |
| PHACGLYtm|LdBPK_191590 | N | N |  | DTMPtm|LdBPK_151140 | UD | N |  | MAT6m|LdBPK_282600 | UD | N |
| PYRtm|LdBPK_040440 | N | N |  | DTTPtn|LdBPK_160030 | UD | N |  | MCMAT3m|LdBPK_230410 | UD | N |
| UBQtm|LdBPK_131090 | N | N |  | DTTPtn|LdBPK_211490 | UD | N |  | MCMAT5m|LdBPK_262730 | UD | N |
| 13DPGt|LdBPK_323110 | UD | N |  | DUTPDPm|LdBPK_353060 | UD | N |  | MCMAT7m|LdBPK_242110 | UD | N |
| 13DPGt|LdBPK_353910 | UD | N |  | EBP2r|LdBPK_270090 | UD | N |  | MCMAT7m|LdBPK_332740 | UD | N |
| 14BP1P2|LdBPK_312980 | UD | N |  | ECAPLH|LdBPK_030190 | UD | N |  | MCOATAm|LdBPK_283090 | UD | N |
| 1ag3p_tm|LdBPK_050350 | UD | N |  | ECOAH13g|LdBPK_180200 | UD | N |  | MDHg|LdBPK_050180 | UD | N |
| 26D5MCOAtm|LdBPK_330250 | UD | N |  | ECOAH14g|LdBPK_332430 | UD | N |  | MDHg|LdBPK_250020 | UD | N |
| 2H5Htm|LdBPK_364860 | UD | N |  | ECOAH15g|LdBPK_230300 | UD | N |  | MDRPD|LdBPK_060370 | UD | N |
| 34HPPt2m|LdBPK_231920 | UD | N |  | ECOAH16m|LdBPK_271230 | UD | N |  | METS|LdBPK_151490 | UD | N |
| 3ANTHMT|LdBPK_355030 | UD | N |  | ECOAH2m|LdBPK_150860 | UD | N |  | METt6|LdBPK_141400 | UD | N |
| 3DSPHRr|LdBPK_300650 | UD | N |  | ECOAH2m|LdBPK_360240 | UD | N |  | METtm|LdBPK_292910 | UD | N |
| 3HBACOAtm|LdBPK_210980 | UD | N |  | ECOAH3m|LdBPK_180440 | UD | N |  | MEVK|LdBPK_261530 | UD | N |
| 3ISO3COAtm|LdBPK_260120 | UD | N |  | ECOAH3m|LdBPK_191380 | UD | N |  | MEVK|LdBPK_292420 | UD | N |
| 3MBTm|LdBPK_362670 | UD | N |  | ECOAH5m|LdBPK_332860 | UD | N |  | MEVK|LdBPK_350360 | UD | N |
| 3MGCOAtm|LdBPK_242150 | UD | N |  | ECOAH7m|LdBPK_332860 | UD | N |  | MGLYCL|LdBPK_367290 | UD | N |
| 3PGt|LdBPK_350330 | UD | N |  | ECOAH9m|LdBPK_131420 | UD | N |  | MGRA|LdBPK_330530 | UD | N |
| 4COUCOAL|LdBPK_303160 | UD | N |  | ENO|LdBPK_100150 | UD | N |  | MI1PP|LdBPK_180090 | UD | N |
| 4HTHRS|LdBPK_140710 | UD | N |  | ENO|LdBPK_130390 | UD | N |  | MI4PP|LdBPK_171260 | UD | N |
| 4HTHRS|LdBPK_140740 | UD | N |  | ENO|LdBPK_242370 | UD | N |  | MMEm|LdBPK_261600 | UD | N |
| 4HTHRS|LdBPK_140750 | UD | N |  | ENO|LdBPK_321620 | UD | N |  | MMMm|LdBPK_311150 | UD | N |
| 4HTHRS|LdBPK_140760 | UD | N |  | ENO|LdBPK_343280 | UD | N |  | MTAP|LdBPK_151490 | UD | N |
| 5FOTHFtm|LdBPK_292910 | UD | N |  | EPPP2v|LdBPK_041170 | UD | N |  | MTHFD|LdBPK_260310 | UD | N |
| 5MTAt|LdBPK_353390 | UD | N |  | ETAPCT|LdBPK_261530 | UD | N |  | MTHFR|LdBPK_140970 | UD | N |
| 5mtryptatn|LdBPK_040960 | UD | N |  | ETAPCT|LdBPK_332740 | UD | N |  | MTHGXLtm|LdBPK_061340 | UD | N |
| 5mtryptatn|LdBPK_340120 | UD | N |  | ETAPCT|LdBPK_361200 | UD | N |  | MTRI|LdBPK_303290 | UD | N |
| 5mtryptatn|LdBPK_340130 | UD | N |  | ETHAMK|LdBPK_010490 | UD | N |  | NADHDH|LdBPK_351480 | UD | N |
| 7dhchsterolte|LdBPK_110520 | UD | N |  | ETHAMK|LdBPK_010510 | UD | N |  | NADK|LdBPK_240370 | UD | N |
| 7dhchsterolte|LdBPK_131110 | UD | N |  | ETHAMK|LdBPK_010520 | UD | N |  | NADK|LdBPK_350840 | UD | N |
| A1E|LdBPK_313080 | UD | N |  | ETHAMK|LdBPK_010540 | UD | N |  | NADPH_CYOR|LdBPK_141280 | UD | N |
| ACACT1rm|LdBPK_050970 | UD | N |  | ETHAMK|LdBPK_010550 | UD | N |  | NADS2i|LdBPK_240370 | UD | N |
| ACACT3rm|LdBPK_322780 | UD | N |  | ETHAMK|LdBPK_030220 | UD | N |  | NADS2i|LdBPK_350840 | UD | N |
| ACACT4rm|LdBPK_342710 | UD | N |  | ETHAMK|LdBPK_130300 | UD | N |  | NADter|LdBPK_281960 | UD | N |
| ACACT7rm|LdBPK_352980 | UD | N |  | ETHAMK|LdBPK_281250 | UD | N |  | NCAMt|LdBPK_322200 | UD | N |
| ACCOACrm|LdBPK_340630 | UD | N |  | ETHAPT|LdBPK_261530 | UD | N |  | NDPK1|LdBPK_210300 | UD | N |
| accoatm|LdBPK_281390 | UD | N |  | ETHAPT|LdBPK_332740 | UD | N |  | NDPK1|LdBPK_210310 | UD | N |
| ACGAM6PSi|LdBPK_211120 | UD | N |  | ETHAPT|LdBPK_361200 | UD | N |  | NDPK10|LdBPK_210300 | UD | N |
| ACGAM6PSi|LdBPK_300470 | UD | N |  | EX_5mta_e|LdBPK_231560 | UD | N |  | NDPK10|LdBPK_210310 | UD | N |
| ACGAM6Ptg|LdBPK_323110 | UD | N |  | EX_a_D_glucose_e|LdBPK_350360 | UD | N |  | NDPK2|LdBPK_181360 | UD | N |
| ACGAM6Ptg|LdBPK_353910 | UD | N |  | EX_ac_e|LdBPK_303230 | UD | N |  | NDPK2|LdBPK_251790 | UD | N |
| ACGAMPM|LdBPK_231880 | UD | N |  | EX_AHCYS(e)|LdBPK_110550 | UD | N |  | NDPK3|LdBPK_210610 | UD | N |
| ACMAT1m|LdBPK_361840 | UD | N |  | EX_AHCYS(e)|LdBPK_140320 | UD | N |  | NDPK3|LdBPK_362790 | UD | N |
| ACOAD10m|LdBPK_180440 | UD | N |  | EX_AHCYS(e)|LdBPK_310600 | UD | N |  | NDPK4|LdBPK_291950 | UD | N |
| ACOAD10m|LdBPK_191380 | UD | N |  | EX_AHCYS(e)|LdBPK_310610 | UD | N |  | NDPK4|LdBPK_312710 | UD | N |
| ACOAD8m|LdBPK_362670 | UD | N |  | EX_ala_D_e|LdBPK_130020 | UD | N |  | NDPK4|LdBPK_312720 | UD | N |
| ACOAD9m|LdBPK_180440 | UD | N |  | EX_ala_L_e|LdBPK_310580 | UD | N |  | NDPK4|LdBPK_323510 | UD | N |
| ACOAD9m|LdBPK_191380 | UD | N |  | EX_arg_L_e|LdBPK_131360 | UD | N |  | NDPK5|LdBPK_292620 | UD | N |
| ACOAter|LdBPK_353280 | UD | N |  | EX_asn_L_e|LdBPK_060670 | UD | N |  | NDPK7|LdBPK_055450 | UD | N |
| ACPexch|LdBPK_010050 | UD | N |  | EX_asp_L_e|LdBPK_130020 | UD | N |  | NDPK9|LdBPK_230470 | UD | N |
| ACPexch|LdBPK_280260 | UD | N |  | EX_b_D_glucose_e|LdBPK_355300 | UD | N |  | NDPK9|LdBPK_350990 | UD | N |
| ACRCOAtm|LdBPK_260120 | UD | N |  | EX_btn_e|LdBPK_190940 | UD | N |  | NDPKn10|LdBPK_343160 | UD | N |
| ACSm|LdBPK_300170 | UD | N |  | EX_btn_e|LdBPK_190970 | UD | N |  | NDPKn10|LdBPK_351000 | UD | N |
| ACt6|LdBPK_151050 | UD | N |  | EX_ca2_e|LdBPK_242200 | UD | N |  | NDPKn3|LdBPK_141240 | UD | N |
| ACt6|LdBPK_241700 | UD | N |  | EX_co2_e|LdBPK_151510 | UD | N |  | NDPKn3|LdBPK_323910 | UD | N |
| ACtm|LdBPK_160760 | UD | N |  | EX_cys_L_e|LdBPK_111100 | UD | N |  | NDPKn5|LdBPK_361320 | UD | N |
| ADAer|LdBPK_353070 | UD | N |  | EX_dAMP(e)|LdBPK_110520 | UD | N |  | NDPKn9|LdBPK_302990 | UD | N |
| ADAm|LdBPK_353070 | UD | N |  | EX_dAMP(e)|LdBPK_131110 | UD | N |  | NDPKn9|LdBPK_303000 | UD | N |
| ADE34t|LdBPK_030090 | UD | N |  | EX_dCMP(e)|LdBPK_110520 | UD | N |  | NDPKn9|LdBPK_354810 | UD | N |
| ADE34t|LdBPK_030720 | UD | N |  | EX_dCMP(e)|LdBPK_131110 | UD | N |  | NH4tm|LdBPK_230310 | UD | N |
| ADE34t|LdBPK_041140 | UD | N |  | EX_dGMP(e)|LdBPK_060310 | UD | N |  | NICRNTK|LdBPK_030190 | UD | N |
| ADE34t|LdBPK_120620 | UD | N |  | EX_dGMP(e)|LdBPK_100360 | UD | N |  | NNAM|LdBPK_283140 | UD | N |
| ADE34t|LdBPK_200850 | UD | N |  | EX_dGMP(e)|LdBPK_100370 | UD | N |  | NOS|LdBPK_030190 | UD | N |
| ADE34t|LdBPK_212080 | UD | N |  | EX_dGMP(e)|LdBPK_100380 | UD | N |  | NPHPPH|LdBPK_340630 | UD | N |
| ADE34t|LdBPK_230420 | UD | N |  | EX_dGMP(e)|LdBPK_100390 | UD | N |  | NTRLASE4|LdBPK_181220 | UD | N |
| ADE34t|LdBPK_251170 | UD | N |  | EX_dGMP(e)|LdBPK_100400 | UD | N |  | NTRLASE4|LdBPK_181230 | UD | N |
| ADE34t|LdBPK_261690 | UD | N |  | EX_dGMP(e)|LdBPK_100410 | UD | N |  | O2t|LdBPK_251980 | UD | N |
| ADE34t|LdBPK_282880 | UD | N |  | EX_dGMP(e)|LdBPK_100420 | UD | N |  | OCCOADm|LdBPK_120255 | UD | N |
| ADE34t|LdBPK_311600 | UD | N |  | EX_dGMP(e)|LdBPK_190870 | UD | N |  | OCDMAT8m8|LdBPK_180510 | UD | N |
| ADE34t|LdBPK_367350 | UD | N |  | EX_dGMP(e)|LdBPK_241810 | UD | N |  | OCMAT3m|LdBPK_261530 | UD | N |
| ADK1|LdBPK_303120 | UD | N |  | EX_dGMP(e)|LdBPK_355160 | UD | N |  | OCMAT3m|LdBPK_361200 | UD | N |
| ADK1g|LdBPK_110100 | UD | N |  | EX_DOLP(e)|LdBPK_110550 | UD | N |  | OCMAT3m3|LdBPK_350850 | UD | N |
| ADMDCi|LdBPK_312410 | UD | N |  | EX_DOLP(e)|LdBPK_140320 | UD | N |  | OCMAT3m3|LdBPK_351200 | UD | N |
| ADN1t|LdBPK_050500 | UD | N |  | EX_DOLP(e)|LdBPK_310600 | UD | N |  | ODH1mi|LdBPK_221210 | UD | N |
| ADN1t|LdBPK_050510 | UD | N |  | EX_DOLP(e)|LdBPK_310610 | UD | N |  | ODH1mi|LdBPK_281430 | UD | N |
| ADN1t|LdBPK_052580 | UD | N |  | EX_drib_e|LdBPK_221210 | UD | N |  | ODHmi|LdBPK_221210 | UD | N |
| ADN1t|LdBPK_210820 | UD | N |  | EX_dTTP(e)|LdBPK_110550 | UD | N |  | ODHmi|LdBPK_281430 | UD | N |
| ADN1t|LdBPK_212140 | UD | N |  | EX_dTTP(e)|LdBPK_140320 | UD | N |  | OHPHM|LdBPK_302360 | UD | N |
| ADN1t|LdBPK_240640 | UD | N |  | EX_dTTP(e)|LdBPK_310600 | UD | N |  | OMPDCg|LdBPK_353060 | UD | N |
| ADN1t|LdBPK_251210 | UD | N |  | EX_dTTP(e)|LdBPK_310610 | UD | N |  | ORNtg|LdBPK_323110 | UD | N |
| ADN1t|LdBPK_303660 | UD | N |  | EX_dUTP(e)|LdBPK_110550 | UD | N |  | ORNtg|LdBPK_353910 | UD | N |
| ADNK1er|LdBPK_010500 | UD | N |  | EX_dUTP(e)|LdBPK_140320 | UD | N |  | OROTtg|LdBPK_211450 | UD | N |
| ADNK1m|LdBPK_140350 | UD | N |  | EX_dUTP(e)|LdBPK_310600 | UD | N |  | ORPTg|LdBPK_271940 | UD | N |
| ADPT2|LdBPK_140350 | UD | N |  | EX_dUTP(e)|LdBPK_310610 | UD | N |  | ORPTg|LdBPK_290290 | UD | N |
| ADSL1r|LdBPK_351420 | UD | N |  | EX_etha_e|LdBPK_190940 | UD | N |  | OXADPCOAtg|LdBPK_181580 | UD | N |
| ADSS_i|LdBPK_353070 | UD | N |  | EX_etha_e|LdBPK_190970 | UD | N |  | OXADPCOAtm|LdBPK_210980 | UD | N |
| AGMT|LdBPK_080210 | UD | N |  | EX_fol_e|LdBPK_310580 | UD | N |  | P5CDr|LdBPK_230860 | UD | N |
| AGPATi|LdBPK_261530 | UD | N |  | EX_h_e|LdBPK_313050 | UD | N |  | PALMER|LdBPK_366570 | UD | N |
| AGPATi|LdBPK_292420 | UD | N |  | EX_h2o_e|LdBPK_190940 | UD | N |  | PAPAm|LdBPK_367290 | UD | N |
| AGPATi|LdBPK_323830 | UD | N |  | EX_h2o_e|LdBPK_190970 | UD | N |  | PCter|LdBPK_321750 | UD | N |
| AGPATi|LdBPK_332740 | UD | N |  | EX_hxan_e|LdBPK_362510 | UD | N |  | PCtm|LdBPK_332040 | UD | N |
| AGPATi|LdBPK_350360 | UD | N |  | EX_hxan_e|LdBPK_362520 | UD | N |  | PCtm|LdBPK_365630 | UD | N |
| AGPATi|LdBPK_363440 | UD | N |  | EX_inost_e|LdBPK_190940 | UD | N |  | PDHe2|LdBPK_140660 | UD | N |
| AGPATim|LdBPK_261530 | UD | N |  | EX_inost_e|LdBPK_190970 | UD | N |  | PDHe2|LdBPK_140670 | UD | N |
| AGPATim|LdBPK_292420 | UD | N |  | EX_mannan(e)|LdBPK_310900 | UD | N |  | PDHe2|LdBPK_140680 | UD | N |
| AGPATim|LdBPK_323830 | UD | N |  | EX_mannan(e)|LdBPK_310910 | UD | N |  | PEPt|LdBPK_211450 | UD | N |
| AGPATim|LdBPK_332740 | UD | N |  | EX_met_L_e|LdBPK_161410 | UD | N |  | PERLLALDtm|LdBPK_271770 | UD | N |
| AGPATim|LdBPK_350360 | UD | N |  | EX_nh4_e|LdBPK_355300 | UD | N |  | PERLLAtm|LdBPK_230050 | UD | N |
| AGPATim|LdBPK_363440 | UD | N |  | EX_PELDo(e)|LdBPK_110550 | UD | N |  | PFK26|LdBPK_340630 | UD | N |
| AHC|LdBPK_303290 | UD | N |  | EX_PELDo(e)|LdBPK_140320 | UD | N |  | PFKg|LdBPK_140660 | UD | N |
| AHCYSter|LdBPK_210890 | UD | N |  | EX_PELDo(e)|LdBPK_310600 | UD | N |  | PFKg|LdBPK_140670 | UD | N |
| AHDTtn|LdBPK_323110 | UD | N |  | EX_PELDo(e)|LdBPK_310610 | UD | N |  | PFKg|LdBPK_140680 | UD | N |
| AHDTtn|LdBPK_353910 | UD | N |  | EX_pi_e|LdBPK_303230 | UD | N |  | PGI1|LdBPK_060890 | UD | N |
| AHSERL5i|LdBPK_261530 | UD | N |  | EX_ppi_e|LdBPK_270090 | UD | N |  | PGI3|LdBPK_060890 | UD | N |
| AHSERL5i|LdBPK_292420 | UD | N |  | EX_pro_L_e|LdBPK_313050 | UD | N |  | PGKg|LdBPK_060890 | UD | N |
| AHSERL5i|LdBPK_350360 | UD | N |  | EX_ptrc(e)|LdBPK_110550 | UD | N |  | PGL|LdBPK_320940 | UD | N |
| AKGDe1|LdBPK_191490 | UD | N |  | EX_ptrc(e)|LdBPK_140320 | UD | N |  | PGLYPtm|LdBPK_281390 | UD | N |
| AKGDE2B|LdBPK_270090 | UD | N |  | EX_ptrc(e)|LdBPK_310600 | UD | N |  | PGMT|LdBPK_060890 | UD | N |
| ALA_Lt6|LdBPK_366670 | UD | N |  | EX_ptrc(e)|LdBPK_310610 | UD | N |  | PGPPH|LdBPK_010490 | UD | N |
| ALATA_L|LdBPK_230860 | UD | N |  | EX_pyr_e|LdBPK_151510 | UD | N |  | PGPPH|LdBPK_010510 | UD | N |
| ALATRSi|LdBPK_260310 | UD | N |  | EX_thym_e|LdBPK_231560 | UD | N |  | PGPPH|LdBPK_010520 | UD | N |
| ALCD19|LdBPK_230860 | UD | N |  | EX_tyr_L_e|LdBPK_221210 | UD | N |  | PGPPH|LdBPK_010540 | UD | N |
| ALDD19m|LdBPK_040300 | UD | N |  | EX_urea_e|LdBPK_262240 | UD | N |  | PGPPH|LdBPK_010550 | UD | N |
| ALDD19m|LdBPK_040310 | UD | N |  | EX_zymst_e|LdBPK_190940 | UD | N |  | PGPPH|LdBPK_030220 | UD | N |
| ALDD19m|LdBPK_231070 | UD | N |  | EX_zymst_e|LdBPK_190970 | UD | N |  | PGPPH|LdBPK_130300 | UD | N |
| ALDD19m|LdBPK_272290 | UD | N |  | FA_1|LdBPK_044270 | UD | N |  | PGPPH|LdBPK_281250 | UD | N |
| ALDD19m|LdBPK_350640 | UD | N |  | FA_2|LdBPK_230310 | UD | N |  | PGtm|LdBPK_080520 | UD | N |
| ALDD20m|LdBPK_362070 | UD | N |  | FA_3ACPH|LdBPK_072500 | UD | N |  | PGtm|LdBPK_081040 | UD | N |
| ALDD32m|LdBPK_310620 | UD | N |  | FA_3ACPH|LdBPK_271710 | UD | N |  | PHACCOAtm|LdBPK_300940 | UD | N |
| ALDD8xr_m|LdBPK_140660 | UD | N |  | FA_4ACPH|LdBPK_151050 | UD | N |  | PHACCOAtm|LdBPK_300950 | UD | N |
| ALDD8xr_m|LdBPK_140670 | UD | N |  | FA_4ACPH|LdBPK_241700 | UD | N |  | PHACCOAtm|LdBPK_343380 | UD | N |
| ALDD8xr_m|LdBPK_140680 | UD | N |  | FA160ACPH|LdBPK_190710 | UD | N |  | PHCYTm|LdBPK_071260 | UD | N |
| ALDOXm|LdBPK_261670 | UD | N |  | FA180ACPtm|LdBPK_353730 | UD | N |  | PHE4MOi2|LdBPK_261600 | UD | N |
| ALDOXm|LdBPK_261680 | UD | N |  | FA181ACPH|LdBPK_340140 | UD | N |  | PHEMEtm|LdBPK_070820 | UD | N |
| ALDR|LdBPK_241880 | UD | N |  | FA181ACPH|LdBPK_340150 | UD | N |  | PHETA1|LdBPK_341170 | UD | N |
| ALDR|LdBPK_242110 | UD | N |  | FA181ACPH|LdBPK_340160 | UD | N |  | PHETRS|LdBPK_282250 | UD | N |
| ALDR|LdBPK_272390 | UD | N |  | FA181ACPH|LdBPK_340170 | UD | N |  | PHETRS|LdBPK_366220 | UD | N |
| ALINCOAe|LdBPK_262730 | UD | N |  | FA182ACPtm|LdBPK_331660 | UD | N |  | PI45BPP|LdBPK_180090 | UD | N |
| AMETter|LdBPK_366570 | UD | N |  | FA1ACPtm|LdBPK_282100 | UD | N |  | PIN3K|LdBPK_040300 | UD | N |
| AMPDg|LdBPK_060760 | UD | N |  | FACOAL140|LdBPK_332860 | UD | N |  | PIN3K|LdBPK_040310 | UD | N |
| APIND|LdBPK_040300 | UD | N |  | FACOAL180|LdBPK_332860 | UD | N |  | PIN3K|LdBPK_231070 | UD | N |
| APIND|LdBPK_040310 | UD | N |  | FACOAL182|LdBPK_332860 | UD | N |  | PIN3K|LdBPK_272290 | UD | N |
| APIND|LdBPK_231070 | UD | N |  | FAS100COAr|LdBPK_340630 | UD | N |  | PIN3K|LdBPK_350640 | UD | N |
| APIND|LdBPK_272290 | UD | N |  | FAS140COAr|LdBPK_340630 | UD | N |  | PIN4K|LdBPK_040300 | UD | N |
| APIND|LdBPK_350640 | UD | N |  | FAS180COAr|LdBPK_340630 | UD | N |  | PIN4K|LdBPK_040310 | UD | N |
| APINM|LdBPK_252550 | UD | N |  | FAS204COA|LdBPK_340630 | UD | N |  | PIN4K|LdBPK_231070 | UD | N |
| ARGDC|LdBPK_323460 | UD | N |  | FAS224COAr|LdBPK_340630 | UD | N |  | PIN4K|LdBPK_272290 | UD | N |
| ARGNg|LdBPK_282250 | UD | N |  | FAS60COAr|LdBPK_340630 | UD | N |  | PIN4K|LdBPK_350640 | UD | N |
| ARGNg|LdBPK_366220 | UD | N |  | FBP26|LdBPK_340630 | UD | N |  | PIt2p|LdBPK_200630 | UD | N |
| ARGSSgr|LdBPK_030190 | UD | N |  | FBPg|LdBPK_051160 | UD | N |  | PLAc|LdBPK_071260 | UD | N |
| ARGtg|LdBPK_221110 | UD | N |  | FCL|LdBPK_302100 | UD | N |  | PLAPc|LdBPK_141420 | UD | N |
| ARGtg|LdBPK_271970 | UD | N |  | FETe|LdBPK_262730 | UD | N |  | PMANMg|LdBPK_241880 | UD | N |
| ARGtg|LdBPK_280980 | UD | N |  | FOLt|LdBPK_280140 | UD | N |  | PMANMg|LdBPK_242110 | UD | N |
| ASAT|LdBPK_313030 | UD | N |  | FORter|LdBPK_170300 | UD | N |  | PMANMg|LdBPK_272390 | UD | N |
| ASCt2|LdBPK_070330 | UD | N |  | FRDg|LdBPK_131420 | UD | N |  | PMETM|LdBPK_101460 | UD | N |
| ASCt2|LdBPK_110250 | UD | N |  | FRDPtg|LdBPK_200630 | UD | N |  | PMEVK|LdBPK_363230 | UD | N |
| ASCt2|LdBPK_130670 | UD | N |  | FRDPtm|LdBPK_171580 | UD | N |  | PMEVKx|LdBPK_190350 | UD | N |
| ASCt2|LdBPK_270100 | UD | N |  | FTHFLr|LdBPK_302590 | UD | N |  | PMTCOAe|LdBPK_061110 | UD | N |
| ASCt2|LdBPK_292260 | UD | N |  | FUMg|LdBPK_340070 | UD | N |  | PMTCOAter|LdBPK_060480 | UD | N |
| ASCt2|LdBPK_300370 | UD | N |  | FUMm|LdBPK_361200 | UD | N |  | PNS1|LdBPK_020470 | UD | N |
| ASCt2|LdBPK_300620 | UD | N |  | G3PDcm|LdBPK_261530 | UD | N |  | PNS3|LdBPK_260040 | UD | N |
| ASCt2|LdBPK_321900 | UD | N |  | G3PDcm|LdBPK_332740 | UD | N |  | PNTK|LdBPK_091100 | UD | N |
| ASCt2|LdBPK_364460 | UD | N |  | G3PDcm|LdBPK_361200 | UD | N |  | PNTO_Rte|LdBPK_322800 | UD | N |
| ASNN|LdBPK_221390 | UD | N |  | G5SAm_spt|LdBPK_060350 | UD | N |  | PNTO_Rte|LdBPK_331510 | UD | N |
| ASNS3|LdBPK_150440 | UD | N |  | G5SDrm|LdBPK_330730 | UD | N |  | PNTO_Rte|LdBPK_355070 | UD | N |
| ASNt6|LdBPK_354790 | UD | N |  | G6PDAg|LdBPK_050180 | UD | N |  | PNTO_Rte|LdBPK_355320 | UD | N |
| ASNt6|LdBPK_363990 | UD | N |  | G6PDAg|LdBPK_250020 | UD | N |  | PNTO_Rte|LdBPK_360450 | UD | N |
| ASNt6|LdBPK_364000 | UD | N |  | G6PDHg|LdBPK_366160 | UD | N |  | PNTO_Rte|LdBPK_367150 | UD | N |
| ASNtg|LdBPK_240790 | UD | N |  | G6Ptg|LdBPK_160550 | UD | N |  | PNTOt2|LdBPK_360060 | UD | N |
| ASPCT|LdBPK_210700 | UD | N |  | GALKx|LdBPK_241880 | UD | N |  | PPA_1|LdBPK_271330 | UD | N |
| ASPTA1m|LdBPK_230860 | UD | N |  | GALKx|LdBPK_242110 | UD | N |  | PPA_1|LdBPK_351480 | UD | N |
| ASPTA4|LdBPK_340630 | UD | N |  | GALKx|LdBPK_272390 | UD | N |  | PPATM|LdBPK_260120 | UD | N |
| ASPtg|LdBPK_111000 | UD | N |  | GALS3a|LdBPK_241880 | UD | N |  | PPCDC|LdBPK_030970 | UD | N |
| ASPTRS|LdBPK_364650 | UD | N |  | GALS3a|LdBPK_242110 | UD | N |  | PPCDC|LdBPK_366160 | UD | N |
| ATPS|LdBPK_070360 | UD | N |  | GALS3a|LdBPK_272390 | UD | N |  | PPCKg|LdBPK_262290 | UD | N |
| ATPSm|LdBPK_141280 | UD | N |  | GAM6Ptg|LdBPK_160540 | UD | N |  | PPDKg|LdBPK_251160 | UD | N |
| BTCOAter|LdBPK_353280 | UD | N |  | GAMNCt|LdBPK_050980 | UD | N |  | PPit|LdBPK_360060 | UD | N |
| BTCOAtm|LdBPK_240370 | UD | N |  | GAMNCt|LdBPK_170320 | UD | N |  | PPItg|LdBPK_160580 | UD | N |
| BTMAT1m|LdBPK_261530 | UD | N |  | GAMNCt|LdBPK_181460 | UD | N |  | PPItm|LdBPK_260030 | UD | N |
| BTMAT1m|LdBPK_361200 | UD | N |  | GAMNCt|LdBPK_270300 | UD | N |  | PPItn|LdBPK_331150 | UD | N |
| BTMAT1m1|LdBPK_351190 | UD | N |  | GAMNCt|LdBPK_270590 | UD | N |  | PPItn|LdBPK_362390 | UD | N |
| C14STRr|LdBPK_150940 | UD | N |  | GAMNCt|LdBPK_282170 | UD | N |  | PPM2|LdBPK_180810 | UD | N |
| C14STRr|LdBPK_171510 | UD | N |  | GAMNCt|LdBPK_323370 | UD | N |  | PPM2|LdBPK_240330 | UD | N |
| C3STDH1r|LdBPK_150940 | UD | N |  | GAMNCt|LdBPK_352010 | UD | N |  | PPM2|LdBPK_366160 | UD | N |
| C3STDH1r|LdBPK_171510 | UD | N |  | GAMNCtg|LdBPK_323110 | UD | N |  | PPPGO|LdBPK_312360 | UD | N |
| C3STDH2r|LdBPK_302970 | UD | N |  | GAMNCtg|LdBPK_353910 | UD | N |  | PRODXm|LdBPK_210300 | UD | N |
| C3STDH2r|LdBPK_350040 | UD | N |  | GAMNt|LdBPK_292910 | UD | N |  | PRODXm|LdBPK_210310 | UD | N |
| C4STMO1r|LdBPK_044320 | UD | N |  | GAMNtg|LdBPK_323110 | UD | N |  | PROm|LdBPK_030190 | UD | N |
| C4STMO1r|LdBPK_262520 | UD | N |  | GAMNtg|LdBPK_353910 | UD | N |  | PROTRS|LdBPK_360040 | UD | N |
| C4STMO1r|LdBPK_312790 | UD | N |  | GAPD|LdBPK_100150 | UD | N |  | PRPPSi|LdBPK_364030 | UD | N |
| C4STMO1r|LdBPK_350560 | UD | N |  | GAPD|LdBPK_130390 | UD | N |  | PS_tm|LdBPK_211490 | UD | N |
| C4STMO1r|LdBPK_360400 | UD | N |  | GAPD|LdBPK_242370 | UD | N |  | PSACTROPtm|LdBPK_141460 | UD | N |
| C5STDSr|LdBPK_020100 | UD | N |  | GAPD|LdBPK_321620 | UD | N |  | PSD|LdBPK_141420 | UD | N |
| C5STDSr|LdBPK_201140 | UD | N |  | GAPD|LdBPK_343280 | UD | N |  | PSEUTROPtm|LdBPK_330250 | UD | N |
| C5STDSr|LdBPK_242090 | UD | N |  | GAPt|LdBPK_060580 | UD | N |  | PTD1INOter|LdBPK_365160 | UD | N |
| C5STDSr|LdBPK_301840 | UD | N |  | GCCa|LdBPK_140700 | UD | N |  | PTHK|LdBPK_030970 | UD | N |
| C5STDSr|LdBPK_343750 | UD | N |  | GCCb|LdBPK_181050 | UD | N |  | PTHK|LdBPK_366160 | UD | N |
| C5STDSr|LdBPK_344160 | UD | N |  | GDNBT|LdBPK_060980 | UD | N |  | PTR1a|LdBPK_353070 | UD | N |
| C8STIr|LdBPK_343370 | UD | N |  | GK1er|LdBPK_210300 | UD | N |  | PTRCt|LdBPK_051140 | UD | N |
| CaATPAC|LdBPK_341860 | UD | N |  | GK1er|LdBPK_210310 | UD | N |  | PTRCt|LdBPK_120480 | UD | N |
| CDAL2|LdBPK_060910 | UD | N |  | GK1er|LdBPK_362450 | UD | N |  | PTRCt|LdBPK_180560 | UD | N |
| CDAL2|LdBPK_282700 | UD | N |  | GLCBt2|LdBPK_171450 | UD | N |  | PTRCt|LdBPK_211590 | UD | N |
| CDAL2|LdBPK_352780 | UD | N |  | GLCBtg|LdBPK_170410 | UD | N |  | PTRCt|LdBPK_212160 | UD | N |
| CDGPTm|LdBPK_261530 | UD | N |  | GLCBtg|LdBPK_322210 | UD | N |  | PTRCt|LdBPK_230150 | UD | N |
| CDGPTm|LdBPK_292420 | UD | N |  | GLCRtm|LdBPK_151120 | UD | N |  | PTRCt|LdBPK_230380 | UD | N |
| CDGPTm|LdBPK_323830 | UD | N |  | GLCRtm|LdBPK_151140 | UD | N |  | PTRCt|LdBPK_281260 | UD | N |
| CDGPTm|LdBPK_332740 | UD | N |  | GLINCOAtm|LdBPK_330250 | UD | N |  | PTRCt|LdBPK_282610 | UD | N |
| CDGPTm|LdBPK_350360 | UD | N |  | GLNS_i|LdBPK_060910 | UD | N |  | PTRCt|LdBPK_303720 | UD | N |
| CDGPTm|LdBPK_363440 | UD | N |  | GLNS_i|LdBPK_282700 | UD | N |  | PTRCt|LdBPK_320970 | UD | N |
| CDPCHOLtm|LdBPK_242150 | UD | N |  | GLNS_i|LdBPK_352780 | UD | N |  | PTRCt|LdBPK_343460 | UD | N |
| CDPDSP|LdBPK_261530 | UD | N |  | GLNtm|LdBPK_170870 | UD | N |  | PTRCt|LdBPK_350710 | UD | N |
| CDPDSP|LdBPK_292420 | UD | N |  | GLNtn|LdBPK_323110 | UD | N |  | PTRCt|LdBPK_363250 | UD | N |
| CDPDSP|LdBPK_323830 | UD | N |  | GLNtn|LdBPK_353910 | UD | N |  | PTROPACE|LdBPK_260790 | UD | N |
| CDPDSP|LdBPK_332740 | UD | N |  | GLNTRNAtm|LdBPK_292910 | UD | N |  | PUNP6|LdBPK_120490 | UD | N |
| CDPDSP|LdBPK_350360 | UD | N |  | GLNTRS|LdBPK_060910 | UD | N |  | PUNP8I|LdBPK_151070 | UD | N |
| CDPDSP|LdBPK_363440 | UD | N |  | GLNTRS|LdBPK_282700 | UD | N |  | PYDXK|LdBPK_161410 | UD | N |
| CDPDSPm|LdBPK_261530 | UD | N |  | GLNTRS|LdBPK_352780 | UD | N |  | PYDXNt|LdBPK_070700 | UD | N |
| CDPDSPm|LdBPK_292420 | UD | N |  | GLNTRSm_i|LdBPK_060910 | UD | N |  | PYDXNt|LdBPK_070720 | UD | N |
| CDPDSPm|LdBPK_323830 | UD | N |  | GLNTRSm_i|LdBPK_282700 | UD | N |  | PYDXt|LdBPK_221380 | UD | N |
| CDPDSPm|LdBPK_332740 | UD | N |  | GLNTRSm_i|LdBPK_352780 | UD | N |  | PYRt2|LdBPK_340080 | UD | N |
| CDPDSPm|LdBPK_350360 | UD | N |  | GLU5K|LdBPK_322470 | UD | N |  | QDPR|LdBPK_262500 | UD | N |
| CDPDSPm|LdBPK_363440 | UD | N |  | GLUCYSL|LdBPK_060910 | UD | N |  | RAFFH|LdBPK_241880 | UD | N |
| CDPtn|LdBPK_331150 | UD | N |  | GLUCYSL|LdBPK_282700 | UD | N |  | RAFFH|LdBPK_242110 | UD | N |
| CDPtn|LdBPK_362390 | UD | N |  | GLUCYSL|LdBPK_352780 | UD | N |  | RAFFH|LdBPK_272390 | UD | N |
| CH4tn|LdBPK_323110 | UD | N |  | GLUDx_M|LdBPK_230860 | UD | N |  | RBK_Dg|LdBPK_161340 | UD | N |
| CH4tn|LdBPK_353910 | UD | N |  | GLUt6|LdBPK_231270 | UD | N |  | RBK_Dg|LdBPK_355060 | UD | N |
| CHLPCTD|LdBPK_261530 | UD | N |  | GLUTCOAtm|LdBPK_292910 | UD | N |  | RBLLtg|LdBPK_060890 | UD | N |
| CHLPCTD|LdBPK_292420 | UD | N |  | GLUTRS|LdBPK_060910 | UD | N |  | RNDR1_n|LdBPK_120490 | UD | N |
| CHLPCTD|LdBPK_323830 | UD | N |  | GLUTRS|LdBPK_282700 | UD | N |  | RNDR3_n|LdBPK_200120 | UD | N |
| CHLPCTD|LdBPK_332740 | UD | N |  | GLUTRS|LdBPK_352780 | UD | N |  | RNDR4_n|LdBPK_200110 | UD | N |
| CHLPCTD|LdBPK_350360 | UD | N |  | GLUTRSm|LdBPK_060910 | UD | N |  | RPE|LdBPK_180810 | UD | N |
| CHLPCTD|LdBPK_363440 | UD | N |  | GLUTRSm|LdBPK_282700 | UD | N |  | RPE|LdBPK_240330 | UD | N |
| CHLt6|LdBPK_110210 | UD | N |  | GLUTRSm|LdBPK_352780 | UD | N |  | RPE|LdBPK_366160 | UD | N |
| CHOLK|LdBPK_261530 | UD | N |  | GLYALDtm|LdBPK_252480 | UD | N |  | RPEg|LdBPK_200500 | UD | N |
| CHOLK|LdBPK_292420 | UD | N |  | GLYALDtm|LdBPK_361410 | UD | N |  | RPEg|LdBPK_280240 | UD | N |
| CHOLK|LdBPK_323830 | UD | N |  | GLYCt5|LdBPK_311240 | UD | N |  | RU5PLtg|LdBPK_323110 | UD | N |
| CHOLK|LdBPK_332740 | UD | N |  | GLYCtg|LdBPK_323110 | UD | N |  | RU5PLtg|LdBPK_353910 | UD | N |
| CHOLK|LdBPK_350360 | UD | N |  | GLYCtg|LdBPK_353910 | UD | N |  | Ru5ptg|LdBPK_221110 | UD | N |
| CHOLK|LdBPK_363440 | UD | N |  | GLYKg|LdBPK_230860 | UD | N |  | Ru5ptg|LdBPK_271970 | UD | N |
| CLPNSm|LdBPK_010490 | UD | N |  | GLYOX1|LdBPK_230120 | UD | N |  | Ru5ptg|LdBPK_280980 | UD | N |
| CLPNSm|LdBPK_010510 | UD | N |  | GLYt6|LdBPK_060890 | UD | N |  | S6PFH|LdBPK_241880 | UD | N |
| CLPNSm|LdBPK_010520 | UD | N |  | GLYt6|LdBPK_230310 | UD | N |  | S6PFH|LdBPK_242110 | UD | N |
| CLPNSm|LdBPK_010540 | UD | N |  | GLYTm|LdBPK_300940 | UD | N |  | S6PFH|LdBPK_272390 | UD | N |
| CLPNSm|LdBPK_010550 | UD | N |  | GLYTm|LdBPK_300950 | UD | N |  | S7Ptg|LdBPK_323110 | UD | N |
| CLPNSm|LdBPK_030220 | UD | N |  | GLYTm|LdBPK_343380 | UD | N |  | S7Ptg|LdBPK_353910 | UD | N |
| CLPNSm|LdBPK_130300 | UD | N |  | GMPS2|LdBPK_354660 | UD | N |  | SAM24MTr|LdBPK_190350 | UD | N |
| CLPNSm|LdBPK_281250 | UD | N |  | GMPter|LdBPK_050830 | UD | N |  | SBPP1r|LdBPK_313030 | UD | N |
| CLPNte|LdBPK_330310 | UD | N |  | GPAM|LdBPK_261530 | UD | N |  | SELPS|LdBPK_030580 | UD | N |
| CLPNte|LdBPK_366560 | UD | N |  | GPAM|LdBPK_332740 | UD | N |  | SELPS|LdBPK_120850 | UD | N |
| CLPNtm|LdBPK_242150 | UD | N |  | GPAM|LdBPK_361200 | UD | N |  | SERD_L|LdBPK_321220 | UD | N |
| CO2t|LdBPK_340080 | UD | N |  | GPDDA2|LdBPK_261530 | UD | N |  | SERPTr|LdBPK_111010 | UD | N |
| CO2tm|LdBPK_330250 | UD | N |  | GPDDA2|LdBPK_332740 | UD | N |  | SERter|LdBPK_310010 | UD | N |
| CO2tp|LdBPK_160560 | UD | N |  | GPDDA2|LdBPK_361200 | UD | N |  | SERtm|LdBPK_100270 | UD | N |
| COAter|LdBPK_353280 | UD | N |  | GRTT|LdBPK_050180 | UD | N |  | SERtm|LdBPK_110220 | UD | N |
| COAtg|LdBPK_323110 | UD | N |  | GRTT|LdBPK_250020 | UD | N |  | SGPL12r|LdBPK_150940 | UD | N |
| COAtg|LdBPK_353910 | UD | N |  | GSADHm|LdBPK_332650 | UD | N |  | SGPL12r|LdBPK_171510 | UD | N |
| COAtm|LdBPK_242150 | UD | N |  | GSN2t|LdBPK_342500 | UD | N |  | SHMT|LdBPK_353130 | UD | N |
| CPPPGO|LdBPK_313250 | UD | N |  | GSS|LdBPK_310860 | UD | N |  | SHSL1|LdBPK_181660 | UD | N |
| CSm|LdBPK_131420 | UD | N |  | GSS|LdBPK_310870 | UD | N |  | SHSL4r|LdBPK_120580 | UD | N |
| CTL2|LdBPK_240370 | UD | N |  | GSS|LdBPK_312540 | UD | N |  | SHSL4r|LdBPK_350840 | UD | N |
| CTL2|LdBPK_350840 | UD | N |  | GTHS|LdBPK_230860 | UD | N |  | SINCOAL|LdBPK_140470 | UD | N |
| CTPS2n|LdBPK_210700 | UD | N |  | GUAt2|LdBPK_354790 | UD | N |  | SPHK21r|LdBPK_111010 | UD | N |
| CTPtm|LdBPK_282880 | UD | N |  | GUAt2|LdBPK_363990 | UD | N |  | SPMDte|LdBPK_330310 | UD | N |
| CTPtn|LdBPK_010310 | UD | N |  | GUAt2|LdBPK_364000 | UD | N |  | SPMDte|LdBPK_366560 | UD | N |
| CYOO6m|LdBPK_181310 | UD | N |  | H2St|LdBPK_030890 | UD | N |  | SPMS|LdBPK_310860 | UD | N |
| CYSDS|LdBPK_311070 | UD | N |  | H3MS|LdBPK_302360 | UD | N |  | SPMS|LdBPK_310870 | UD | N |
| CYSt6|LdBPK_354790 | UD | N |  | HACD1m|LdBPK_332860 | UD | N |  | SPMS|LdBPK_312540 | UD | N |
| CYSt6|LdBPK_363990 | UD | N |  | HACD3m|LdBPK_332860 | UD | N |  | SQer|LdBPK_363230 | UD | N |
| CYSt6|LdBPK_364000 | UD | N |  | HACD5m|LdBPK_332860 | UD | N |  | SQLS|LdBPK_150270 | UD | N |
| CYSTRS|LdBPK_261530 | UD | N |  | HACD8m|LdBPK_230300 | UD | N |  | SQLS|LdBPK_300130 | UD | N |
| CYSTRS|LdBPK_292420 | UD | N |  | HACD9m|LdBPK_030190 | UD | N |  | SQLter|LdBPK_364100 | UD | N |
| CYSTRS|LdBPK_350360 | UD | N |  | HBCOADm|LdBPK_030190 | UD | N |  | SRTNtn|LdBPK_323110 | UD | N |
| CYSTS|LdBPK_240370 | UD | N |  | HBCOAE|LdBPK_131420 | UD | N |  | SRTNtn|LdBPK_353910 | UD | N |
| CYSTS|LdBPK_350840 | UD | N |  | HBUHL1m|LdBPK_261530 | UD | N |  | ST14DMr|LdBPK_282600 | UD | N |
| CYT1t|LdBPK_040010 | UD | N |  | HBUHL1m|LdBPK_361200 | UD | N |  | STRCOAtg|LdBPK_221110 | UD | N |
| CYT1t|LdBPK_331060 | UD | N |  | HCO3Em|LdBPK_322070 | UD | N |  | STRCOAtg|LdBPK_271970 | UD | N |
| CYTK1|LdBPK_120490 | UD | N |  | HCYSMT|LdBPK_160590 | UD | N |  | STRCOAtg|LdBPK_280980 | UD | N |
| CYTK1|LdBPK_343160 | UD | N |  | HDCOADm|LdBPK_363750 | UD | N |  | STRCOAtm|LdBPK_351490 | UD | N |
| CYTK1n|LdBPK_080060 | UD | N |  | HDDHL5m|LdBPK_180580 | UD | N |  | Succoatm|LdBPK_300940 | UD | N |
| CYTK1n|LdBPK_282380 | UD | N |  | HDDHL5m|LdBPK_323830 | UD | N |  | Succoatm|LdBPK_300950 | UD | N |
| CYTK1n|LdBPK_332230 | UD | N |  | HDDHL5m|LdBPK_332740 | UD | N |  | Succoatm|LdBPK_343380 | UD | N |
| CYTK1n|LdBPK_364270 | UD | N |  | HDDR5m|LdBPK_270740 | UD | N |  | SUCCt6|LdBPK_280140 | UD | N |
| CYTK1n|LdBPK_366960 | UD | N |  | HDDR5m|LdBPK_363630 | UD | N |  | SUCCtg|LdBPK_100040 | UD | N |
| D_LACt2|LdBPK_301550 | UD | N |  | HDMAT7m|LdBPK_252220 | UD | N |  | SUCOGDPm|LdBPK_261530 | UD | N |
| DADAr|LdBPK_030030 | UD | N |  | HDMAT7m|LdBPK_252230 | UD | N |  | SUCOGDPm|LdBPK_292420 | UD | N |
| DADK|LdBPK_070420 | UD | N |  | HDMAT7m|LdBPK_363100 | UD | N |  | SUCOGDPm|LdBPK_350360 | UD | N |
| DADKg|LdBPK_010500 | UD | N |  | HDMAT7m7|LdBPK_363750 | UD | N |  | T2M26DCOAtm|LdBPK_060910 | UD | N |
| DAGAT|LdBPK_010490 | UD | N |  | HEMEASm|LdBPK_313250 | UD | N |  | T2M26DCOAtm|LdBPK_070150 | UD | N |
| DAGAT|LdBPK_010510 | UD | N |  | hemeAtm|LdBPK_300940 | UD | N |  | T2M26DCOAtm|LdBPK_282700 | UD | N |
| DAGAT|LdBPK_010520 | UD | N |  | hemeAtm|LdBPK_300950 | UD | N |  | T2M26DCOAtm|LdBPK_352780 | UD | N |
| DAGAT|LdBPK_010540 | UD | N |  | hemeAtm|LdBPK_343380 | UD | N |  | TAL|LdBPK_100560 | UD | N |
| DAGAT|LdBPK_010550 | UD | N |  | Her|LdBPK_353280 | UD | N |  | TCAFCOAL|LdBPK_140470 | UD | N |
| DAGAT|LdBPK_030220 | UD | N |  | HEX4g|LdBPK_140770 | UD | N |  | TCINCOAL|LdBPK_170300 | UD | N |
| DAGAT|LdBPK_130300 | UD | N |  | HEX4g|LdBPK_140790 | UD | N |  | TDCOAtg|LdBPK_323110 | UD | N |
| DAGAT|LdBPK_281250 | UD | N |  | HEX4g|LdBPK_140800 | UD | N |  | TDCOAtg|LdBPK_353910 | UD | N |
| DAGCPT|LdBPK_010490 | UD | N |  | HEXg|LdBPK_051160 | UD | N |  | TDPGDH|LdBPK_200980 | UD | N |
| DAGCPT|LdBPK_010510 | UD | N |  | HEXNCg|LdBPK_342110 | UD | N |  | TDPGDH|LdBPK_344230 | UD | N |
| DAGCPT|LdBPK_010520 | UD | N |  | HHDHL7m|LdBPK_261530 | UD | N |  | THFAT|LdBPK_100430 | UD | N |
| DAGCPT|LdBPK_010540 | UD | N |  | HHDHL7m|LdBPK_292420 | UD | N |  | THFOCi|LdBPK_340630 | UD | N |
| DAGCPT|LdBPK_010550 | UD | N |  | HHDHL7m|LdBPK_350360 | UD | N |  | THFtm|LdBPK_191010 | UD | N |
| DAGCPT|LdBPK_030220 | UD | N |  | HHDR7m|LdBPK_292080 | UD | N |  | THFtm|LdBPK_320920 | UD | N |
| DAGCPT|LdBPK_130300 | UD | N |  | HIBHrm|LdBPK_292250 | UD | N |  | THRLAD|LdBPK_140710 | UD | N |
| THRLAD|LdBPK_140760 | UD | N |  | THRt6|LdBPK_181490 | UD | N |  |  |  |  |
| THRLAD|LdBPK_140740 | UD | N |  | THRLAD|LdBPK_140750 | UD | N |  |  |  |  |
